# Supplementary material for: Tunable electronic and magnetic properties of planar and corrugated phases of two-dimensional metal–organic frameworks
Source: Royal Society of Chemistry journal article supplement (doi:10.1039/d3nr01170d), 2023-01-01
Supplement: d3nr01170d1.pdf [file d3nr01170d1.pdf]

## Supplementary Information

Tunable Electronic and Magnetic Properties of Planar and Corrugated Phases of Two-dimensional Metal-Organic Frameworks

Ran Wang <sup>a</sup>, Chaozheng He <sup>a\*</sup>, Weixing Chen <sup>a\*</sup>

<sup>a</sup> Institute of Environmental and Energy Catalysis, Shaanxi Key Laboratory of Optoelectronic Functional Materials and Devices, School of Materials Science and Chemical Engineering, Xi'an Technological University, Xi'an 710021, China

\*Corresponding authors.  
E-mail addresses: hecz2019@xatu.edu.cn (C. He); chenwx@xatu.edu.cn (W. Chen);

### The linear response theory (LRT)

The Hubbard  $U$  can be calculated directly by the response function as follows,

$\chi_{IJ} = \frac{\partial E}{\partial n_i \partial n_j} = -\frac{\partial n_i}{\partial \alpha_j}$ . In the LRT approach,  $\chi_{IJ}$  is obtained from the response of  $d$  state occupations ( $n$ ) to a small localized perturbation potential shift  $\alpha$ . An occupation-dependent energy functional is required for the self-consistent solution of the Kohn-Sham equations. The effective interaction parameter  $U$  of site  $I$  can then be calculated as follows:

$$U = \frac{\partial n_{I,0}}{\partial (n_i)} - \frac{\partial n_i}{\partial (n_i)} = [\chi_0^{-1} - \chi^{-1}]_I,$$

where  $\chi_0^{-1}$  and  $\chi^{-1}$  represent the Kohn-Sham and the non-interacting inverse density response functions of the system with respect to the localized potential shift, respectively. The self-consistent determination of  $U$  was performed with VASP. ([http://grandcentral.apam.columbia.edu:5555/tutorials/dft\\_procedures/linear\\_response\\_u/index.html](http://grandcentral.apam.columbia.edu:5555/tutorials/dft_procedures/linear_response_u/index.html)).

### Spin Hamiltonian

The exchange interaction can be conveniently studied by mapping the total energies of the systems with different magnetic orderings to the Ising model with  $J_1$ ,  $J_2$ , and  $J_3$ , respectively:

$$H_{spin} = - \sum_{i,j} J_1 S_i \cdot S_j - \sum_{i,k} J_2 S_i \cdot S_k - \sum_{i,l} J_3 S_i \cdot S_l$$

where  $S_i$  is the magnetic moment at the Ni site and  $(i, j)$ ,  $(i, k)$ , and  $(i, l)$  the nearest, next-nearest, and next-next-nearest Ni atoms, respectively. By mapping the DFT energies to the Hamiltonian,

J can be calculated from the following equations:

$$E_{FM} = E_0 - (4J_1 + 2J_2 + 4J_3)S^2$$

$$E_{AFM} = E_0 - (2J_1 - 2J_2 - 4J_3)S^2$$

$$E_{FIM1} = E_0 - (-2J_2 + 4J_3)S^2$$

$$E_{FIM2} = E_0 - (4J_1 - 2J_2 - 4J_3)S^2$$

### Biaxial strain

Biaxial strain stretching is defined as  $\varepsilon = (a-a_0)/a_0 \times 100\%$ , where  $a$  and  $a_0$  are the lattice constants of the strain structure and the plane structure, respectively.

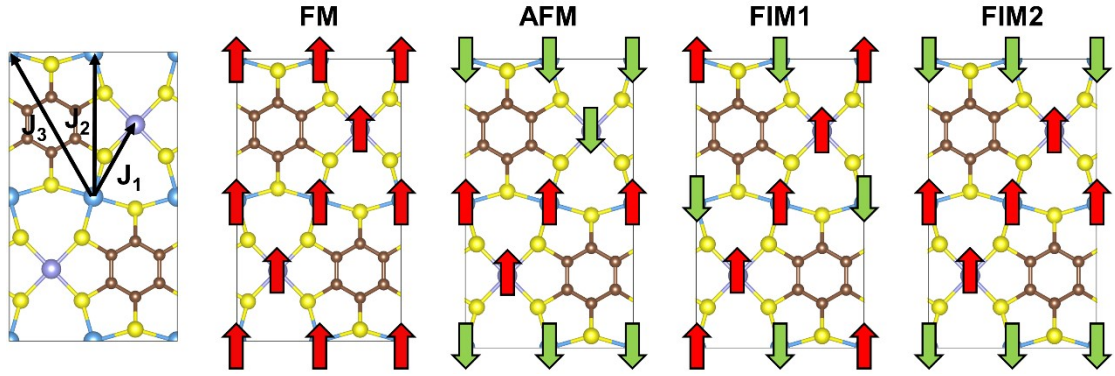

**Fig. S1** The collinear magnetic models and the ferromagnetic (FM), the antiferromagnetic (AFM), and two ferrimagnetic (FIM) states for calculating the magnetic ground state of c-Ni<sub>3</sub>HTB and p-Ni<sub>3</sub>HTB. Three magnetic exchange coupling constants ( $J_1$ ,  $J_2$ , and  $J_3$ ) are shown.

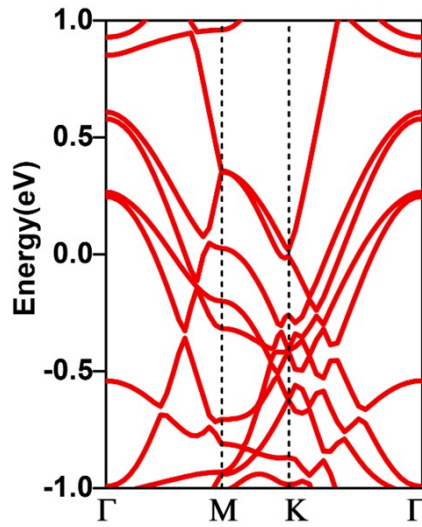

**Fig. S2** Band structures of p-Ni<sub>3</sub>HTB with spin-orbital couplings (SOC).

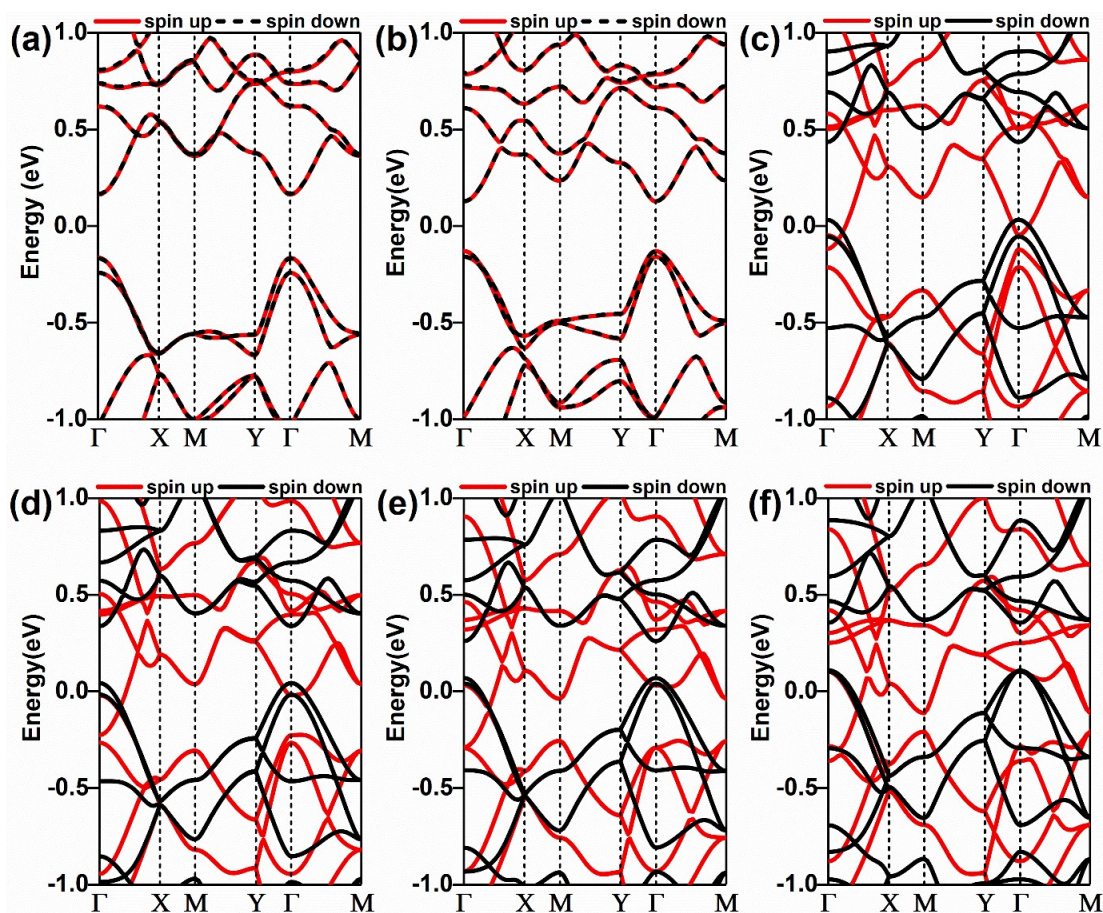

**Fig. S3** Band structures of  $c\text{-Ni}_3\text{HTB}$  by applying biaxial strain from 0 to 5%. Spin-up and spin-down is marked with red and black lines.

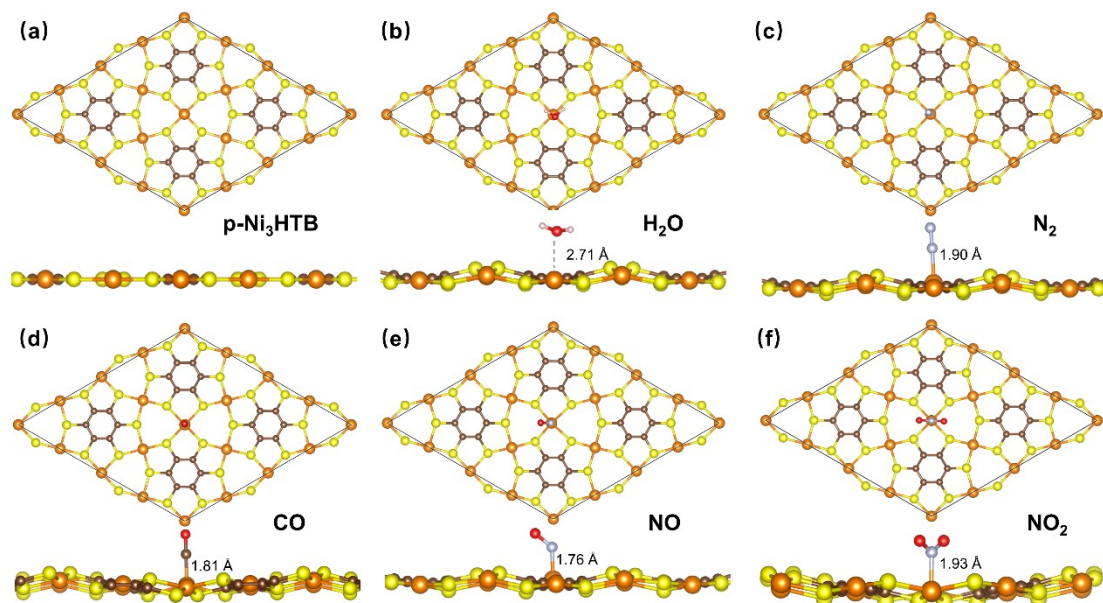

**Fig. S4** Top and side views of the (a)  $2 \times 2 \times 1$   $p\text{-Ni}_3\text{HTB}$  supercell, the most stable adsorption of (b)  $\text{H}_2\text{O}$ , (c)  $\text{N}_2$ , (d)  $\text{CO}$ , (e)  $\text{NO}$ , (f)  $\text{NO}_2$  molecules on  $2 \times 2 \times 1$   $p\text{-Ni}_3\text{HTB}$  supercell.

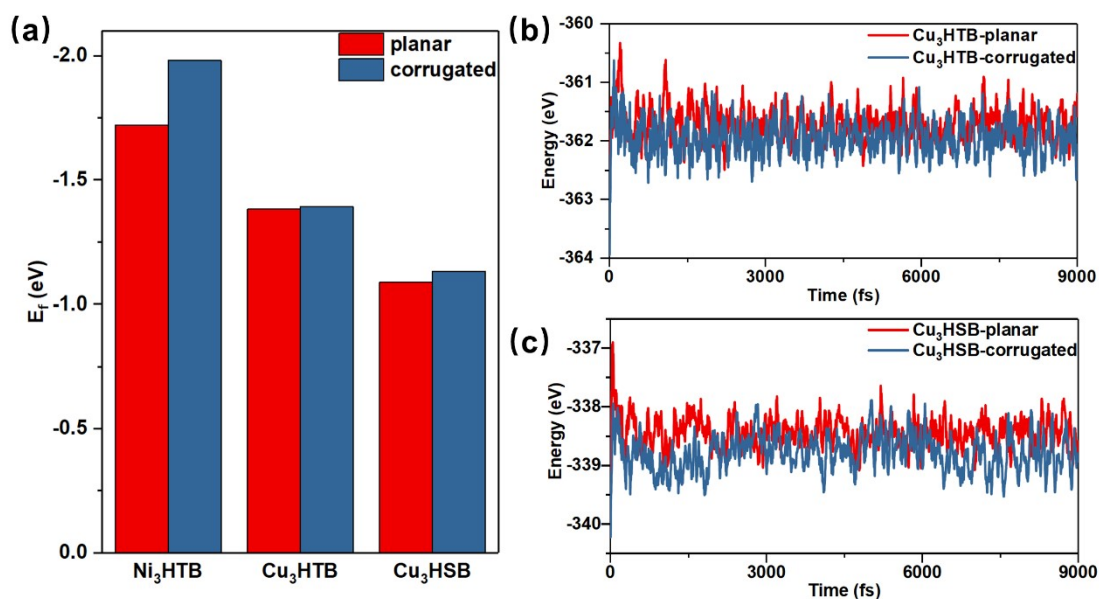

**Fig. S5** (a) The formation energies of the corrugated and planar phases of  $Ni_3HTB$ ,  $Cu_3HTB$ , and  $Cu_3HSB$ . The total potential energy of MOFs as a function of simulation time for (b) c- $Cu_3HTB$  and p- $Cu_3HTB$  (c) c- $Cu_3HSB$  and p- $Cu_3HSB$  by using ab-initio molecular dynamics (300K) in 9 ps.

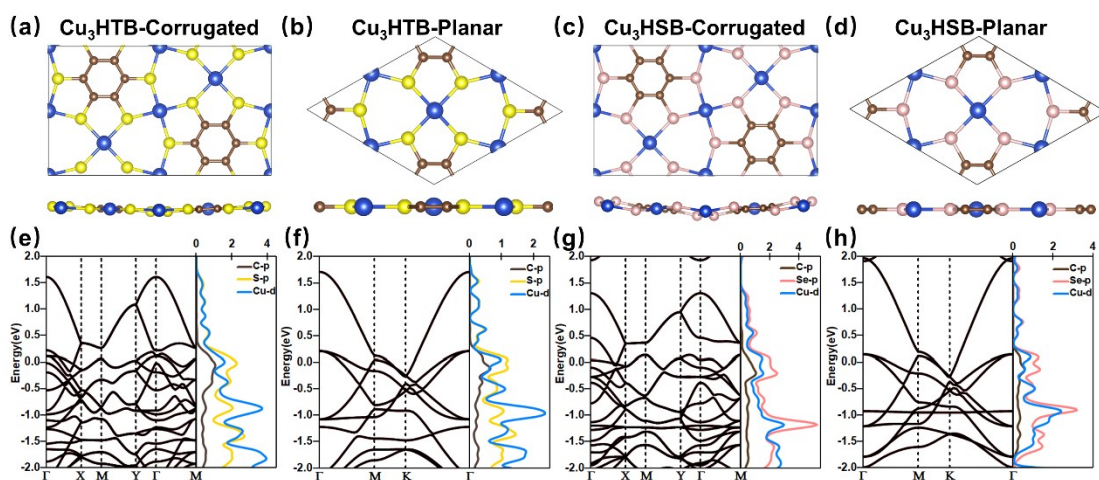

**Fig. S6** Top and side views of (a) c- $Cu_3HTB$ , (b) p- $Cu_3HTB$ , (c) c- $Cu_3HSB$ , and (d) p- $Cu_3HSB$ . Band structures and PDOS of (e) c- $Cu_3HTB$ , (f) p- $Cu_3HTB$ , (g) c- $Cu_3HSB$ , and (h) p- $Cu_3HSB$ , respectively.

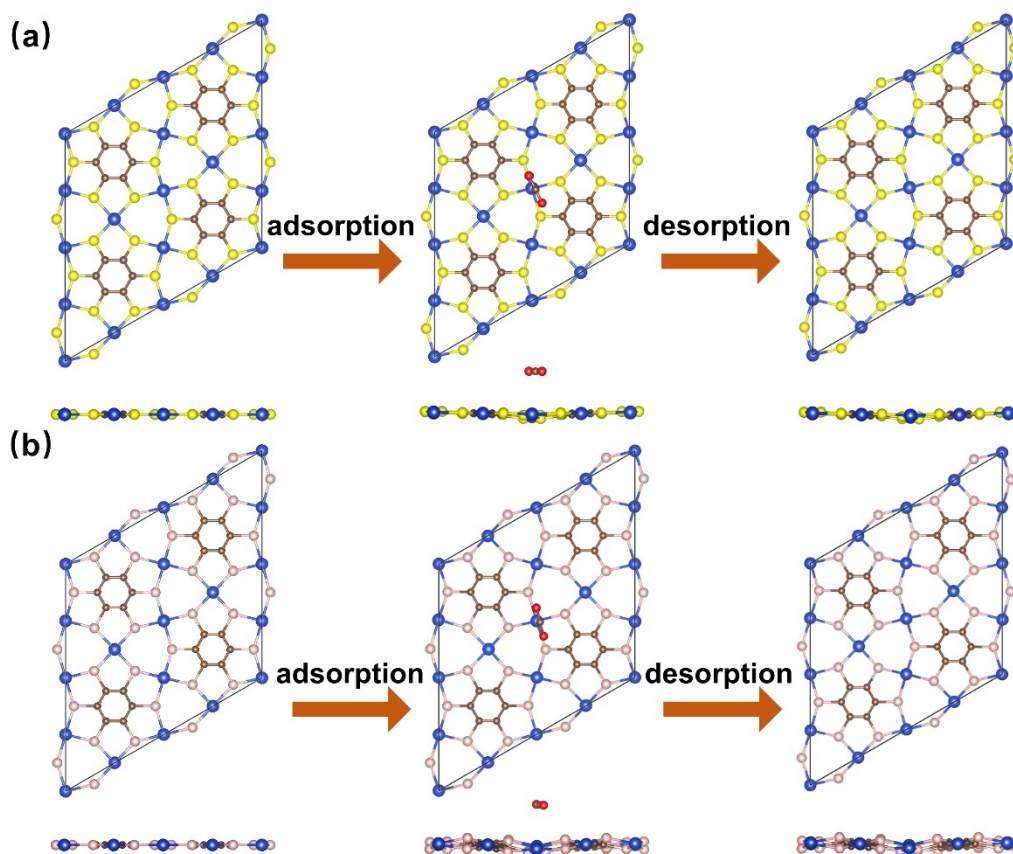

**Fig. S7** Top and side views of the CO<sub>2</sub> molecular adsorbed and desorbed on the p-Cu<sub>3</sub>HTB and p-Cu<sub>3</sub>HSB.

### Geometrical Information

c-Ni<sub>3</sub>HTB

1.0

|              |               |               |
|--------------|---------------|---------------|
| 8.4029483795 | 0.0000000000  | 0.0000000000  |
| 0.0000000000 | 14.4239816666 | 0.0000000000  |
| 0.0000000000 | 0.0000000000  | 15.0000000000 |

S C Ni

12 12 6

Direct

|             |             |             |
|-------------|-------------|-------------|
| 0.067528002 | 0.141133003 | 0.452179019 |
| 0.932471998 | 0.858866997 | 0.452179019 |
| 0.567528002 | 0.858866997 | 0.452179019 |
| 0.432471998 | 0.141133003 | 0.452179019 |
| 0.932783026 | 0.640995975 | 0.477553018 |
| 0.067217003 | 0.359003992 | 0.477553018 |
| 0.432782997 | 0.359003992 | 0.477553018 |
| 0.567216974 | 0.640995975 | 0.477553018 |
| 0.750000000 | 0.458644010 | 0.408065001 |
| 0.250000000 | 0.541356023 | 0.408065001 |
| 0.250000000 | 0.958574025 | 0.520890999 |

|              |              |             |
|--------------|--------------|-------------|
| 0.750000000  | 0.041426000  | 0.520890999 |
| 0.893459012  | 0.201673002  | 0.468546009 |
| 0.106541003  | 0.798327048  | 0.468546009 |
| 0.393458983  | 0.798327048  | 0.468546009 |
| 0.606540988  | 0.201673002  | 0.468546009 |
| 0.106558005  | 0.701637017  | 0.460422993 |
| 0.893441988  | 0.298372999  | 0.460422993 |
| 0.606558012  | 0.298372999  | 0.460422993 |
| 0.393442016  | 0.701637017  | 0.460422993 |
| 0.750000000  | 0.345937004  | 0.447185008 |
| 0.250000000  | 0.654062996  | 0.447185008 |
| 0.250000000  | 0.845931021  | 0.481578000 |
| 0.750000000  | 0.154069012  | 0.481578000 |
| 0.250000000  | 0.250102994  | 0.465418021 |
| 0.750000000  | 0.749897006  | 0.465418021 |
| 0.000000000  | 0.500000000  | 0.438084984 |
| 0.500000000  | 0.500000000  | 0.438084984 |
| -0.000000000 | -0.000000000 | 0.491055012 |
| 0.500000000  | -0.000000000 | 0.491055012 |

p-Ni<sub>3</sub>HTB

1.0

|               |              |               |
|---------------|--------------|---------------|
| 8.5580167770  | 0.0000000000 | 0.0000000000  |
| -4.2790312318 | 7.4114698717 | 0.0000000000  |
| 0.0000000000  | 0.0000000000 | 15.0000000000 |

S C Ni

6 6 3

Direct

|              |             |             |
|--------------|-------------|-------------|
| 0.789305005  | 0.578597004 | 0.500000000 |
| 0.210695008  | 0.421403005 | 0.500000000 |
| 0.421407009  | 0.210700007 | 0.500000000 |
| 0.578593015  | 0.789300050 | 0.500000000 |
| 0.789298006  | 0.210705990 | 0.500000000 |
| 0.210701999  | 0.789294003 | 0.500000000 |
| 0.905306028  | 0.810608064 | 0.500000000 |
| 0.094694003  | 0.189392009 | 0.500000000 |
| 0.189393007  | 0.094694002 | 0.500000000 |
| 0.810607030  | 0.905305998 | 0.500000000 |
| 0.905301984  | 0.094697002 | 0.500000000 |
| 0.094698031  | 0.905303039 | 0.500000000 |
| 0.500000000  | 0.000000000 | 0.500000000 |
| -0.000000000 | 0.500000004 | 0.500000000 |
| 0.500000000  | 0.500000004 | 0.500000000 |
